# Supplementary material for: A sulfur doped carbon nanotube as a potential catalyst for the oxygen reduction reaction
Source: Royal Society of Chemistry journal article supplement (doi:10.1039/c6ra11447d), 2016-01-01
Supplement: c6ra11447d1.pdf [file c6ra11447d1.pdf]

Electronic Supplementary Material (ESI) for RSC Advances.  
This journal is © The Royal Society of Chemistry 2015

## **Supporting information**

### **Title:**

**Sulfur Doped Carbon Nanotube as a Potential Catalyst for Oxygen Reduction Reaction**

### **Authors:**

Hossein Tavakol,\* Fariba Keshavarzipour

### **Address:**

Department of Chemistry, Isfahan University of Technology, Isfahan 84156-83111, Iran; Tell:  
+98-31-33913241; Fax: +98-31-33912350; Email: H\_tavakol@cc.iut.ac.ir.

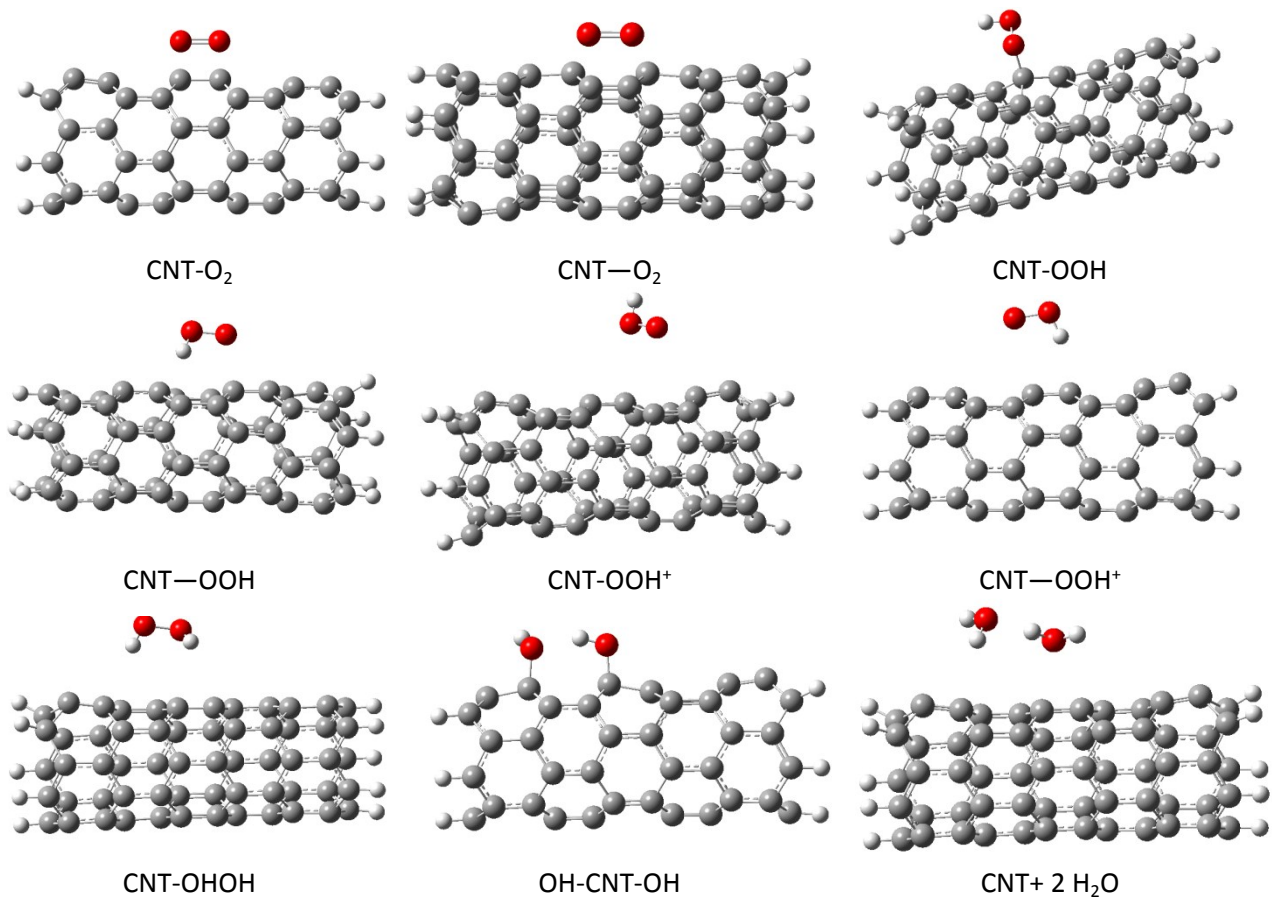

**Fig. S1** Optimized structures of the catalyst and all intermediates of studied ORR reaction

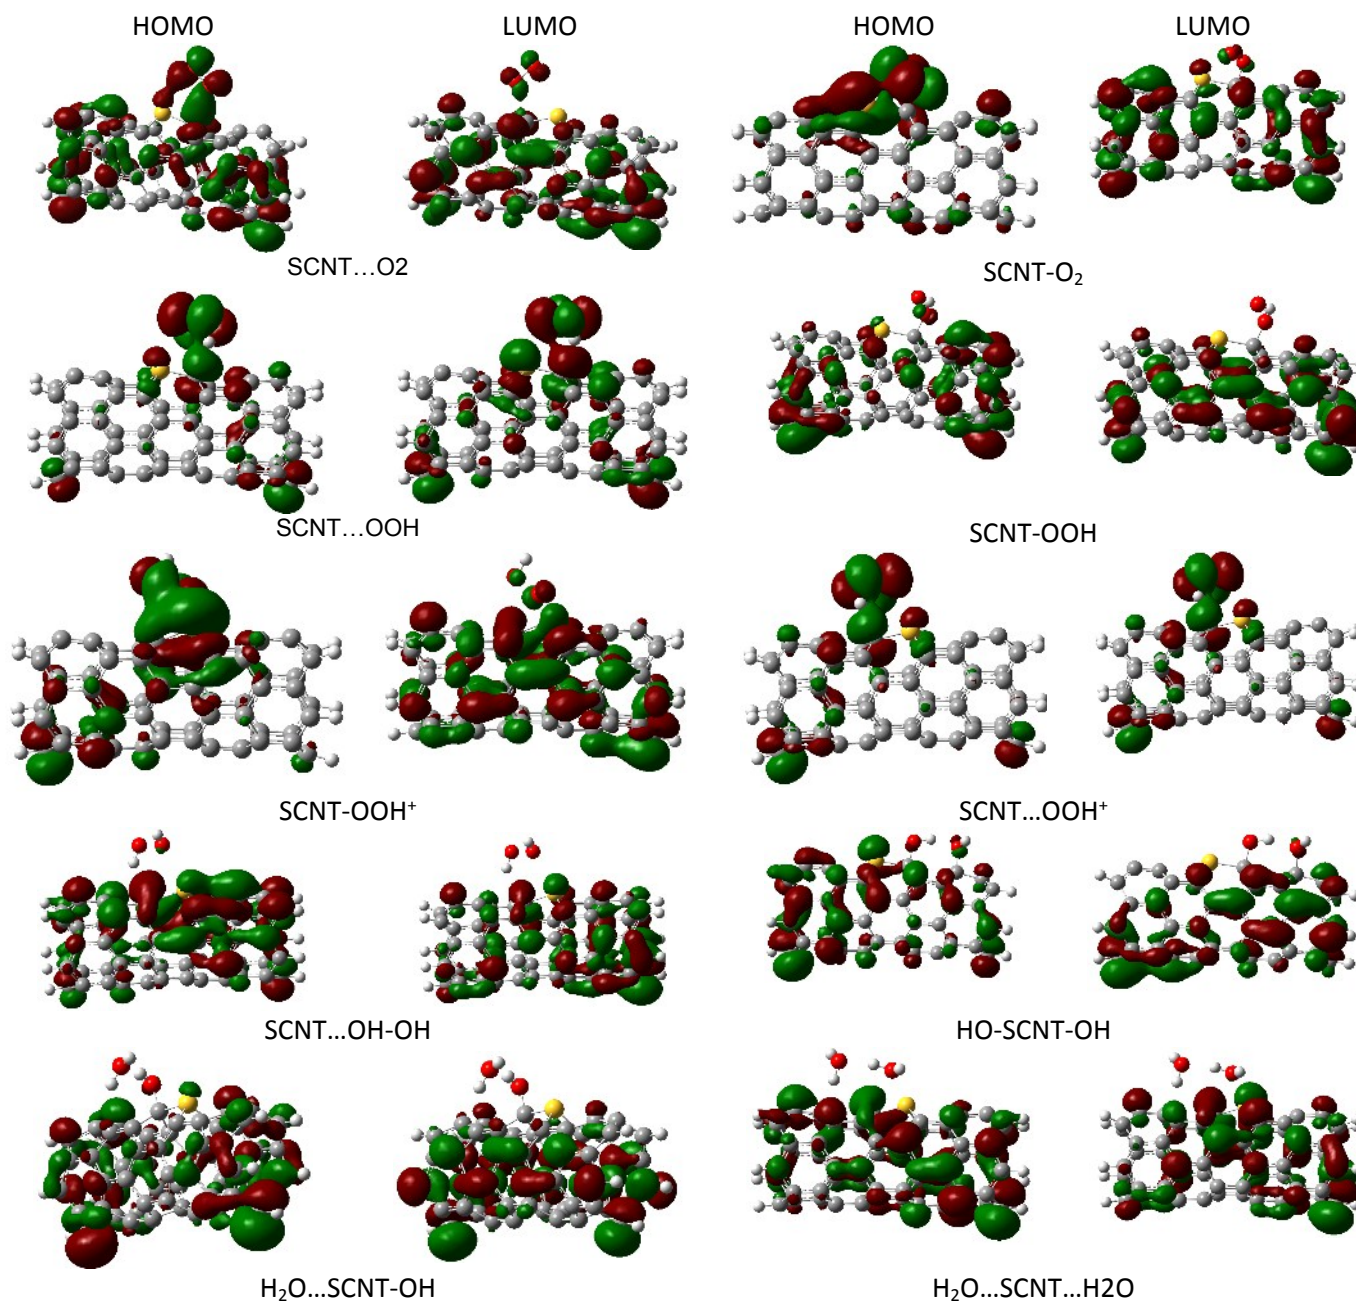

**Fig. S2** The shapes of HOMO and LUMO of all intermediates of SCNT involved in ORR via four-electron mechanism

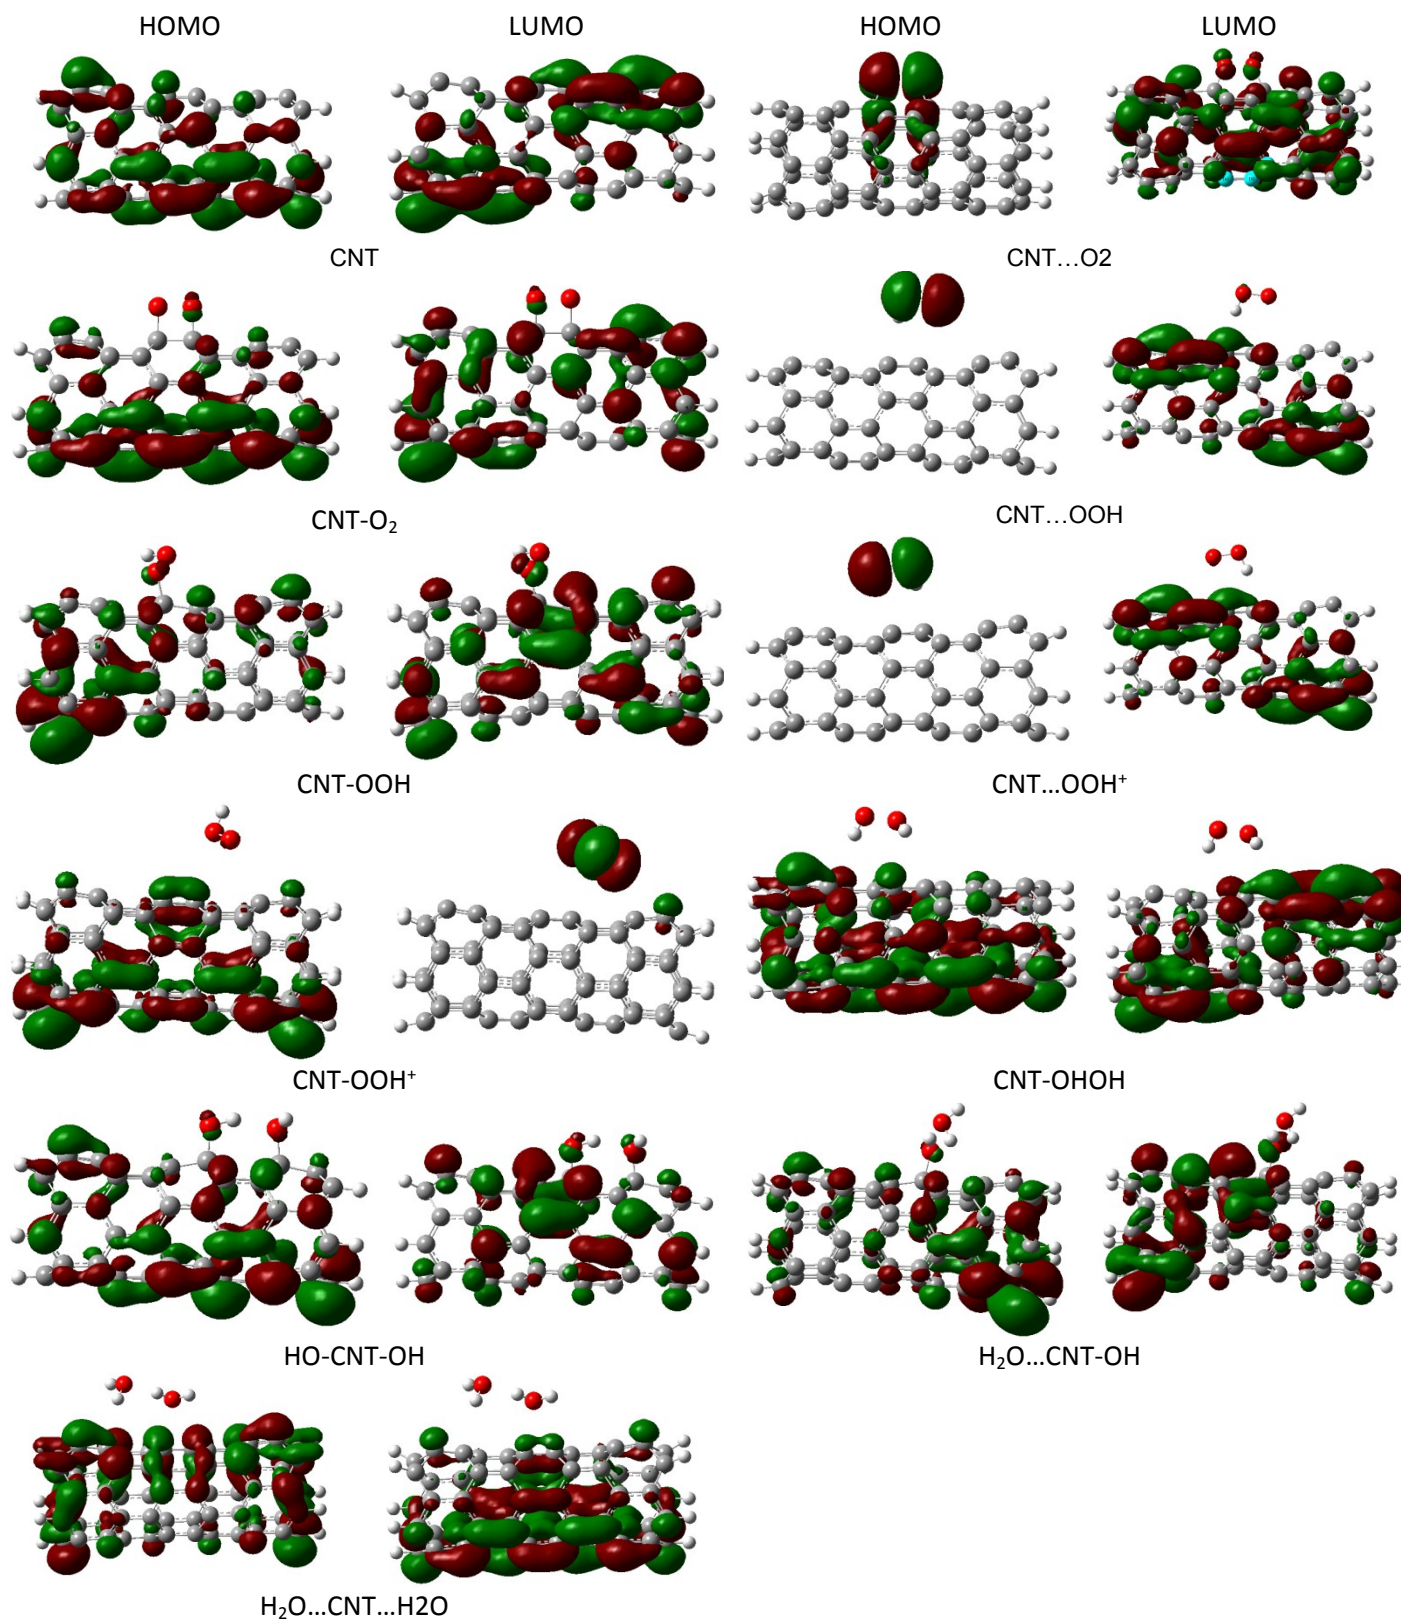

**Fig. S3** The shapes of HOMO and LUMO of all intermediated of CNT involved in ORR via four-electron mechanism
